# Supplementary material for: Integrating National Health Surveys into Nursing Education: A Comparative Study of Students and Young Adults’ Perceptions of the Health System
Source: Research Square preprint supplement (doi:10.21203/rs.3.rs-7802499/v1), 2025-11-24
Supplement: Supplementary file 1 [file 593d5b7391a1ca45068cb278.docx]

**Supplementary File 1**

**English Translation of the Adapted Questionnaire Items**

**Title of the questionnaire:**
Perceptions of the Spanish Health System – Adapted version from the 2024 Spanish Health Barometer (CIS/Ministry of Health)

**Purpose:**
This questionnaire was adapted from the 2024 *Spanish Health Barometer*, a validated national survey tool. It was used in the present study to compare the perceptions of third-year nursing students with those of young adults from the general population regarding the functioning and quality of the Spanish Health System.

**Instructions to participants:**
Please rate each item on a scale from **1 (very poor)** to **10 (very good)**, unless otherwise specified. Your responses are anonymous and will be used only for educational and research purposes.

**Section 1. Overall Assessment of the Health System**

1. In general, how would you rate the overall functioning of the Spanish Health System?
    (1 = Very poor 10 = Very good)
2. In your opinion, does the health system work:
    a) Quite well
    b) Well, but requires some changes
    c) Requires fundamental changes

**Section 2. Primary Care Services**

1. How satisfied are you with primary care consultations overall? (1–10 scale)
2. How much trust do you have in your **primary care physician**? (1–10 scale)
3. How much trust do you have in your **primary care nurse**? (1–10 scale)
4. How would you rate the **time** your physician dedicates to each consultation? (1–10 scale)
5. How would you rate the **information and explanations** you receive during primary care visits? (1–10 scale)

**Section 3. Specialized Care**

1. How satisfied are you with specialized consultations overall? (1–10 scale)
2. During your specialized care visits, how often do you feel you have the **opportunity to ask questions** about your condition or treatment?
    (1 = Never 10 = Always)
3. How easy are the explanations given by specialized care professionals to understand? (1–10 scale)

**Section 4. Emergency Services**

1. How satisfied are you with **hospital emergency services**? (1–10 scale)
2. How satisfied are you with **emergency telephone services (061/112)**? (1–10 scale)

**Section 5. Sociodemographic Information**

1. Age
2. Sex (Female / Male / Prefer not to answer)
3. University campus (Lugo / Santiago de Compostela)

**Note:**
All items maintain the structure and response scales of the 2024 Spanish Health Barometer (*Barómetro Sanitario 2024*), publicly available from the Spanish Ministry of Health and the Centre for Sociological Research (<https://www.sanidad.gob.es/estadEstudios/estadisticas/BarometroSanitario/home_BS.htm>).
